# Supplementary material
Source: MDPI journal article supplement (https://www.mdpi.com/2312-7481/9/6/147)
Supplement: s1 [file s1]

# Supplement Materials

## SUBSTITUTION EFFECTS IN SPIN-POLARIZED

### $(\text{Cr}_{4-x}\text{Fe}_x)_{0.5}\text{AC}$ (A = Ge, Si, Al) MAX PHASES

Natalja A. Fedorova<sup>1,2</sup>, Alena V. Kovaleva<sup>1</sup>, Julia S. Olshevskaya<sup>3</sup>, Daria A. Ivanova<sup>1</sup>,  
Victoria V. Kozak<sup>1,2</sup>, Alexander A. Shubin<sup>2</sup>, Anton S. Tarasov<sup>1,2</sup>, Sergey N. Varnakov<sup>1</sup>,  
Sergei G. Ovchinnikov<sup>1, 2</sup>, Evgeniya M. Moshkina<sup>1</sup>, Olga A. Maximova<sup>1,2</sup>, Pavel V. Avramov<sup>3\*\*</sup>, and  
Felix N. Tomilin<sup>1, 2\*</sup>

<sup>1</sup> Kirensky Institute of Physics, Federal Research Center KSC SB RAS, Krasnoyarsk, 660036 Russia

<sup>2</sup> Siberian Federal University, Krasnoyarsk, 660041 Russia

<sup>3</sup> Department of Chemistry, College of Natural Sciences, Kyungpook National University, 80 Daehak-ro, Buk-gu, Daegu, 41566 Republic of Korea

\*Correspondence: felixnt@gmail.com; paul.veniaminovich@knu.ac.kr

#### Abstract.

The use of spintronic devices with a tunable magnetic order on small scales is highly important for novel applications. The MAX phases containing transition metals and/or magnetic ion-substituted lattices attract a lot of attention. In this study, the magnetic and electronic properties of  $(\text{Cr}_{4-x}\text{Fe}_x)_{0.5}\text{AC}$  (A = Ge, Si, Al) compounds were predicted and investigated within the density functional theory. It was established that single-substituted  $(\text{Cr}_3\text{Fe})_{0.5}\text{AC}$  (A = Ge, Si, Al) lattices are energetically favorable. An analysis of the magnetic states of the MAX phases demonstrated that their spin order changes upon substitution of iron atoms for chromium ones. It was found that mostly the  $(\text{Cr}_{4-x}\text{Fe}_x)_{0.5}\text{GeC}$  and  $(\text{Cr}_{4-x}\text{Fe}_x)_{0.5}\text{AlC}$  lattices acquire a ferrimagnetic state in contrast to  $(\text{Cr}_{4-x}\text{Fe}_x)_{0.5}\text{SiC}$  for which the ferromagnetic spin-order dominates. It was pointed out that the atomic substitution could be an efficient way to tune the magnetic properties of proposed  $(\text{Cr}_{4-x}\text{Fe}_x)_{0.5}\text{AC}$  (A = Ge, Si, Al) MAX phases.

**Keywords:** MAX-phase; density functional theory; B3LYP; spintronics; magnetic and electronic properties.

**Table S1.** Atomic and ionic radii\*

| Element | Atomic radius, Å | Ion charge | Ionic radius, Å |
|---------|------------------|------------|-----------------|
| Fe      | 1.24             | +2         | 0.82            |
|         |                  | +3         | 0.67            |
| Cr      | 1.25             | +3         | 0.64            |

\*- J. Emsley, The Elements, 3<sup>rd</sup> Edition, Oxford University Press, 1989, p. 264.

**Table S2.** Schematic of the ferromagnetic (FM), ferrimagnetic (FiM-*n*), and antiferromagnetic (AFM-*n*) ordering of the Cr and Fe magnetic moments in the (Cr–Fe–Cr–Cr)<sub>0.5</sub>SiC structure. Green and red arrows indicate the spins up and spin down directions on M atoms, respectively

| M<br>atom<br>No.<br>in<br>the<br>cell | Magnetic structure type                                                             |                                                   |                                                            |           |           |           |           |           |                                             |           |           |           |
|---------------------------------------|-------------------------------------------------------------------------------------|---------------------------------------------------|------------------------------------------------------------|-----------|-----------|-----------|-----------|-----------|---------------------------------------------|-----------|-----------|-----------|
|                                       |                                                                                     |                                                   |                                                            |           |           |           |           |           |                                             |           |           |           |
|                                       |                                                                                     | Formally<br>possible<br>for all the<br>structures | Formally possible for only the unsubstituted<br>structures |           |           |           |           |           | Formally possible for all<br>the structures |           |           |           |
|                                       | FM                                                                                  | FM                                                | AFM-<br>1                                                  | AFM-<br>2 | AFM-<br>3 | AFM-<br>4 | AFM-<br>5 | AFM-<br>6 | FiM<br>-1                                   | FiM<br>-2 | FiM<br>-3 | FiM<br>-4 |
| 4                                     | 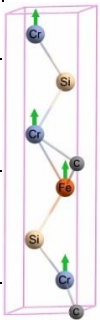 | ↑                                                 | ↑                                                          | ↑         | ↓         | ↓         | ↑         | ↓         | ↑                                           | ↑         | ↑         | ↓         |
| 3                                     |                                                                                     | ↑                                                 | ↑                                                          | ↓         | ↓         | ↑         | ↓         | ↑         | ↑                                           | ↑         | ↓         | ↑         |
| 2                                     |                                                                                     | ↑                                                 | ↓                                                          | ↓         | ↑         | ↑         | ↑         | ↓         | ↑                                           | ↓         | ↑         | ↑         |
| 1                                     |                                                                                     | ↑                                                 | ↓                                                          | ↑         | ↑         | ↓         | ↓         | ↑         | ↓                                           | ↑         | ↑         | ↑         |

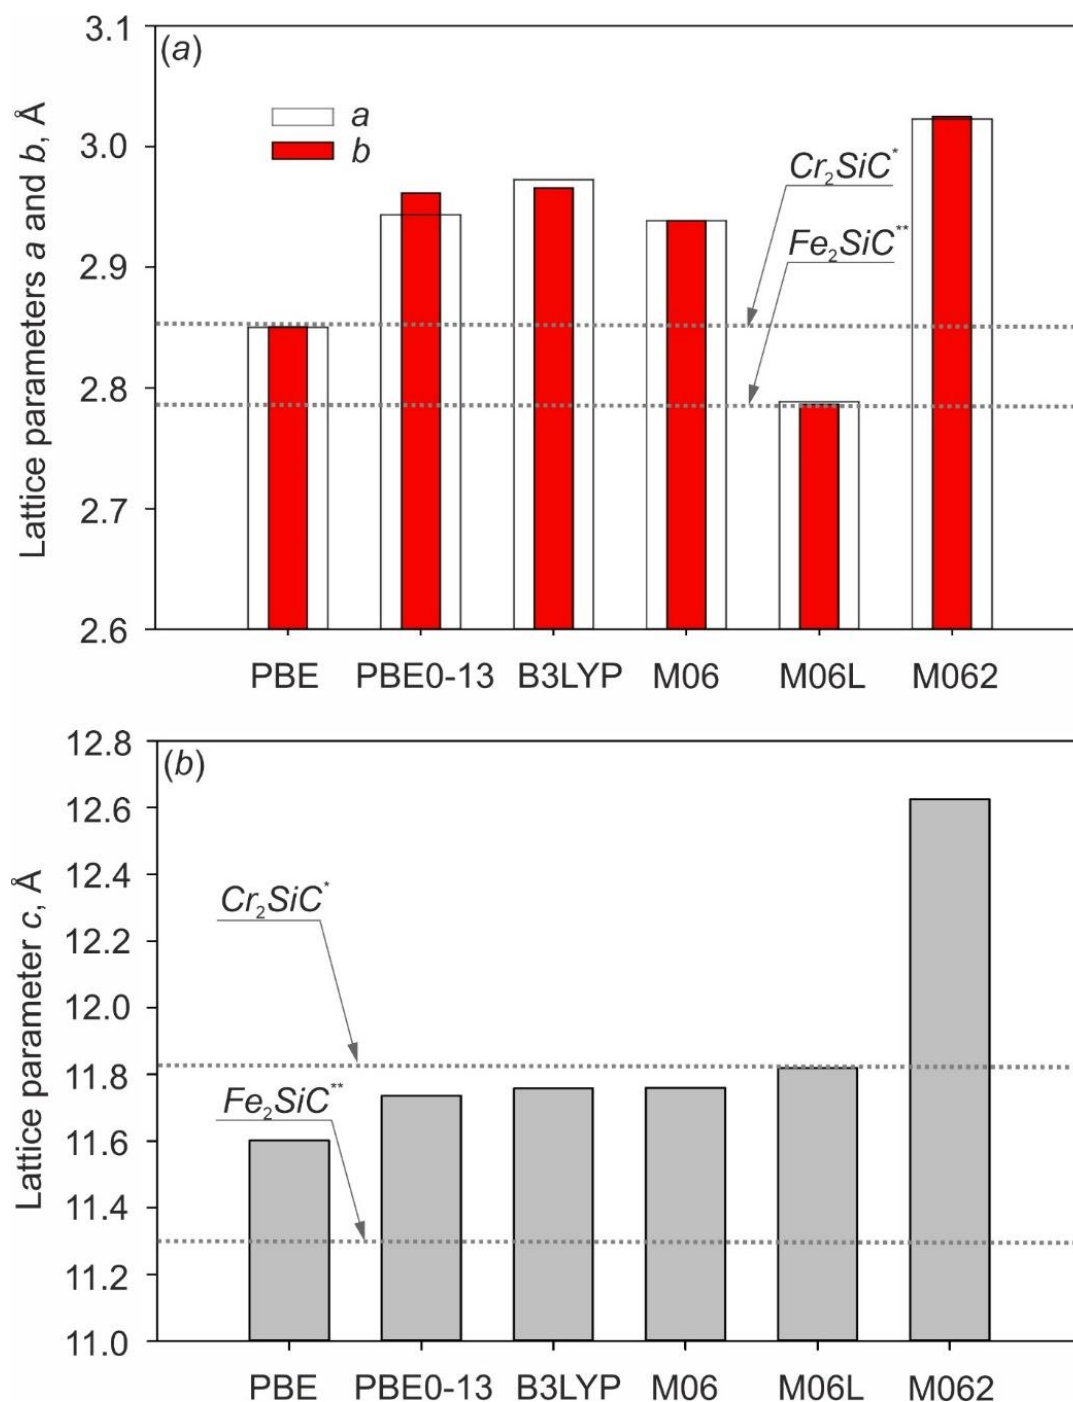

Experiment:

\*- Liao T., Wang J., Zhou Y. Chemical bonding and mechanical properties of  $M_2AC$  ( $M = Ti, V, Cr, A = Al, Si, P, S$ ) ceramics from first-principles investigations // Journal of Materials Research. 2009. Vol. 24, № 2. P. 556–564.

\*\*-. Metadger N. et al. Electronic and magnetic properties of  $Fe_2SiC$  // European Physical Journal B. Springer New York LLC, 2014. Vol. 87, № 10.

**Figure S1.** Comparison of unit cell parameters  $a$ ,  $b$  (on the left), and  $c$  (on the right) obtained using different functionals.

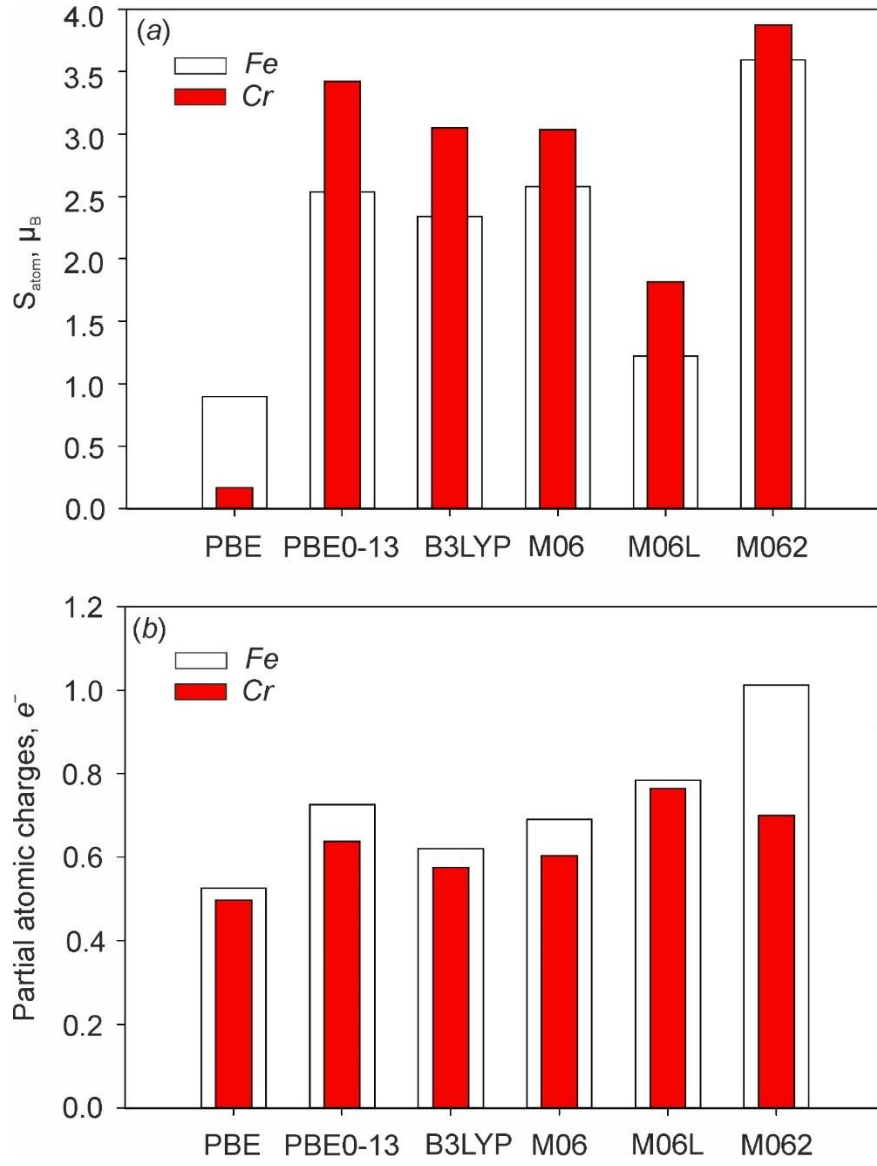

**Figure S2.** Iron and chromium partial charges in the CrFeSiC structure obtained using different functionals (up) and magnetic moment  $S_{\text{atom}}$  ( $\mu_B$ ) of nonequivalent atoms of the metals. Iron and chromium magnetic moments in the CrFeSiC structure obtained using different functionals (down).

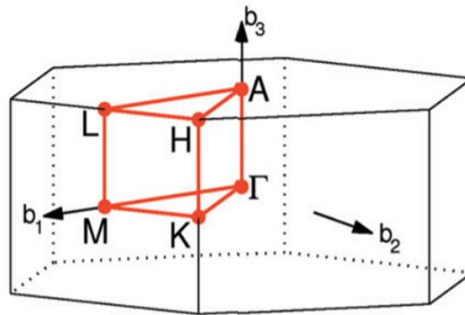

Way:  $\Gamma$ -M-K-A-L-H- $\Gamma$

**Figure S3.** Brillouin zone of a hexagonal lattice.

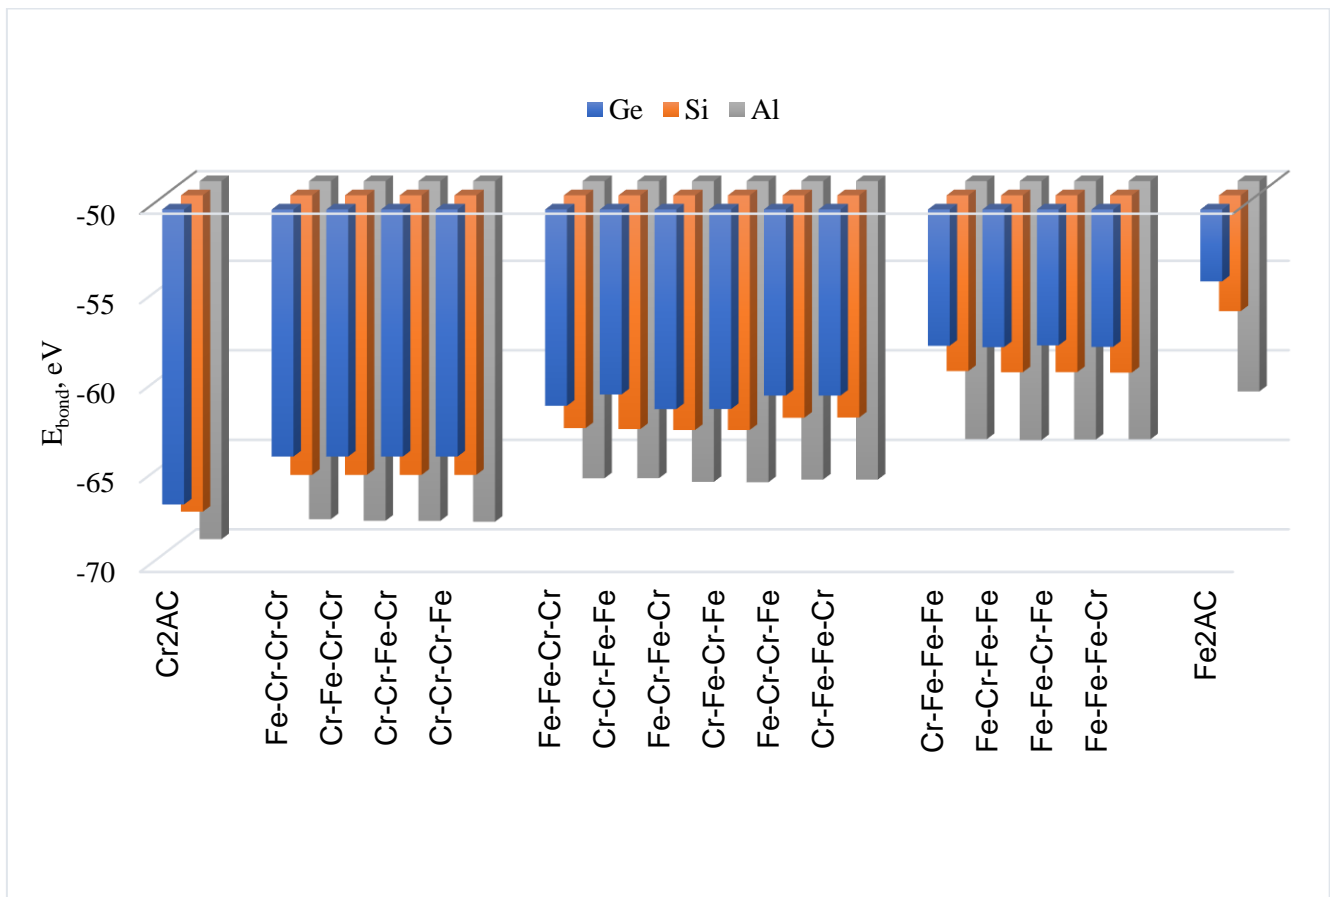

**Figure S4.** Binding energy change in the  $(\text{Cr}_{4-x}\text{Fe}_x)_{0.5}\text{AC}$  (A = Ge, Si, Al) crystal lattices in the ferromagnetic state upon substitution of Fe atoms for Cr ones. Blue, orange, and gray histograms correspond to the phases with Ge, Si, and Al as the A element.

## Total and partial density of states

Densities of states of the  $\text{Cr}_2\text{AC}$ ,  $(\text{Fe}-\text{Cr}-\text{Cr}-\text{Cr})_{0.5}\text{AC}$ , and  $\text{Fe}_2\text{AC}$  ( $\text{A} = \text{Ge}, \text{Si}, \text{Al}$ ) structures. The presented energetically favorable structures in the germanium-based MAX phases are FM for  $\text{Cr}_2\text{GeC}$ , FiM for  $\text{Fe}_1\text{Cr}_3\text{GeC}$ , and FiM for  $\text{Fe}_2\text{GeC}$ . In silicon-based MAX phases, these are FiM for  $\text{Cr}_2\text{SiC}$ , FM for  $\text{Fe}_1\text{Cr}_3\text{SiC}$ , and FM for  $\text{Fe}_2\text{SiC}$ . In the aluminum-based MAX-phases, these are FiM for  $\text{Cr}_2\text{AlC}$ , AFM-6 (FiM) for  $\text{Fe}_1\text{Cr}_3\text{AlC}$ , and FiM for  $\text{Fe}_2\text{AlC}$ .

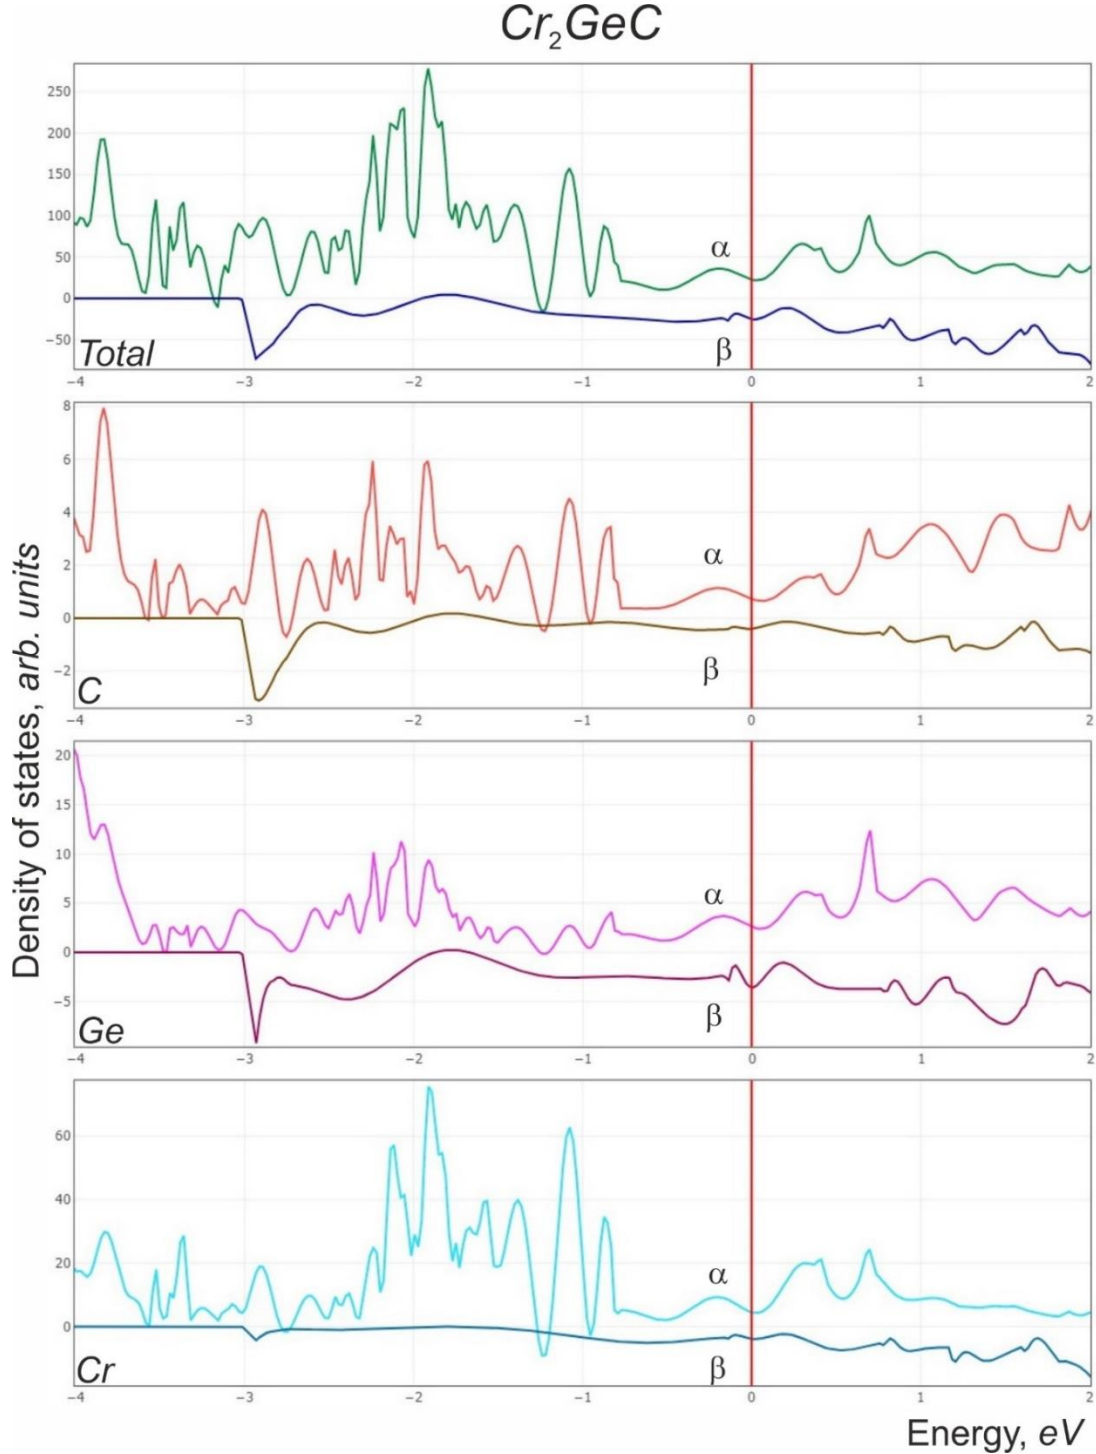

Figure S5. Densities of states of the  $\text{Cr}_2\text{GeC}$ . Partial densities of states of the M element of the first crystal lattice layer (blue), of the M element of the second crystal lattice layer (lilac), of the A element (dark blue), and of the element  $\text{X} = \text{C}$  (burgundy).

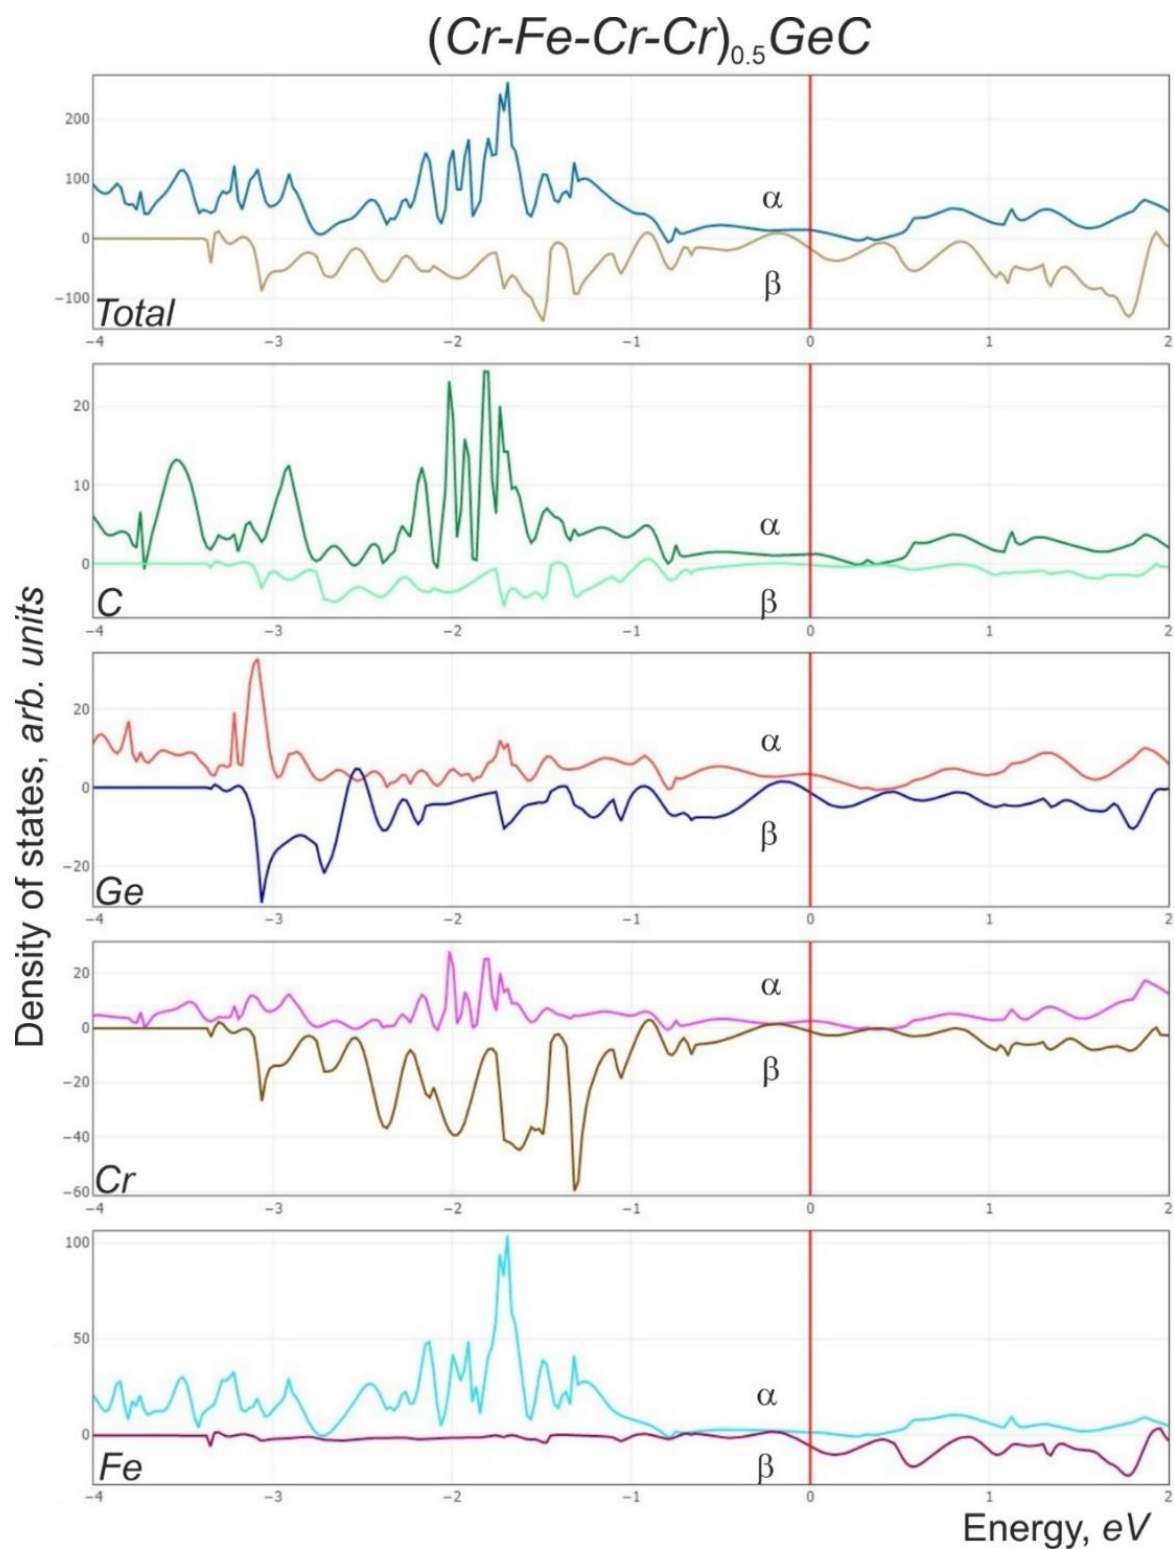

Figure S6. Densities of states of the  $(\text{Cr-Fe-Cr-Cr})\text{GeC}$ .

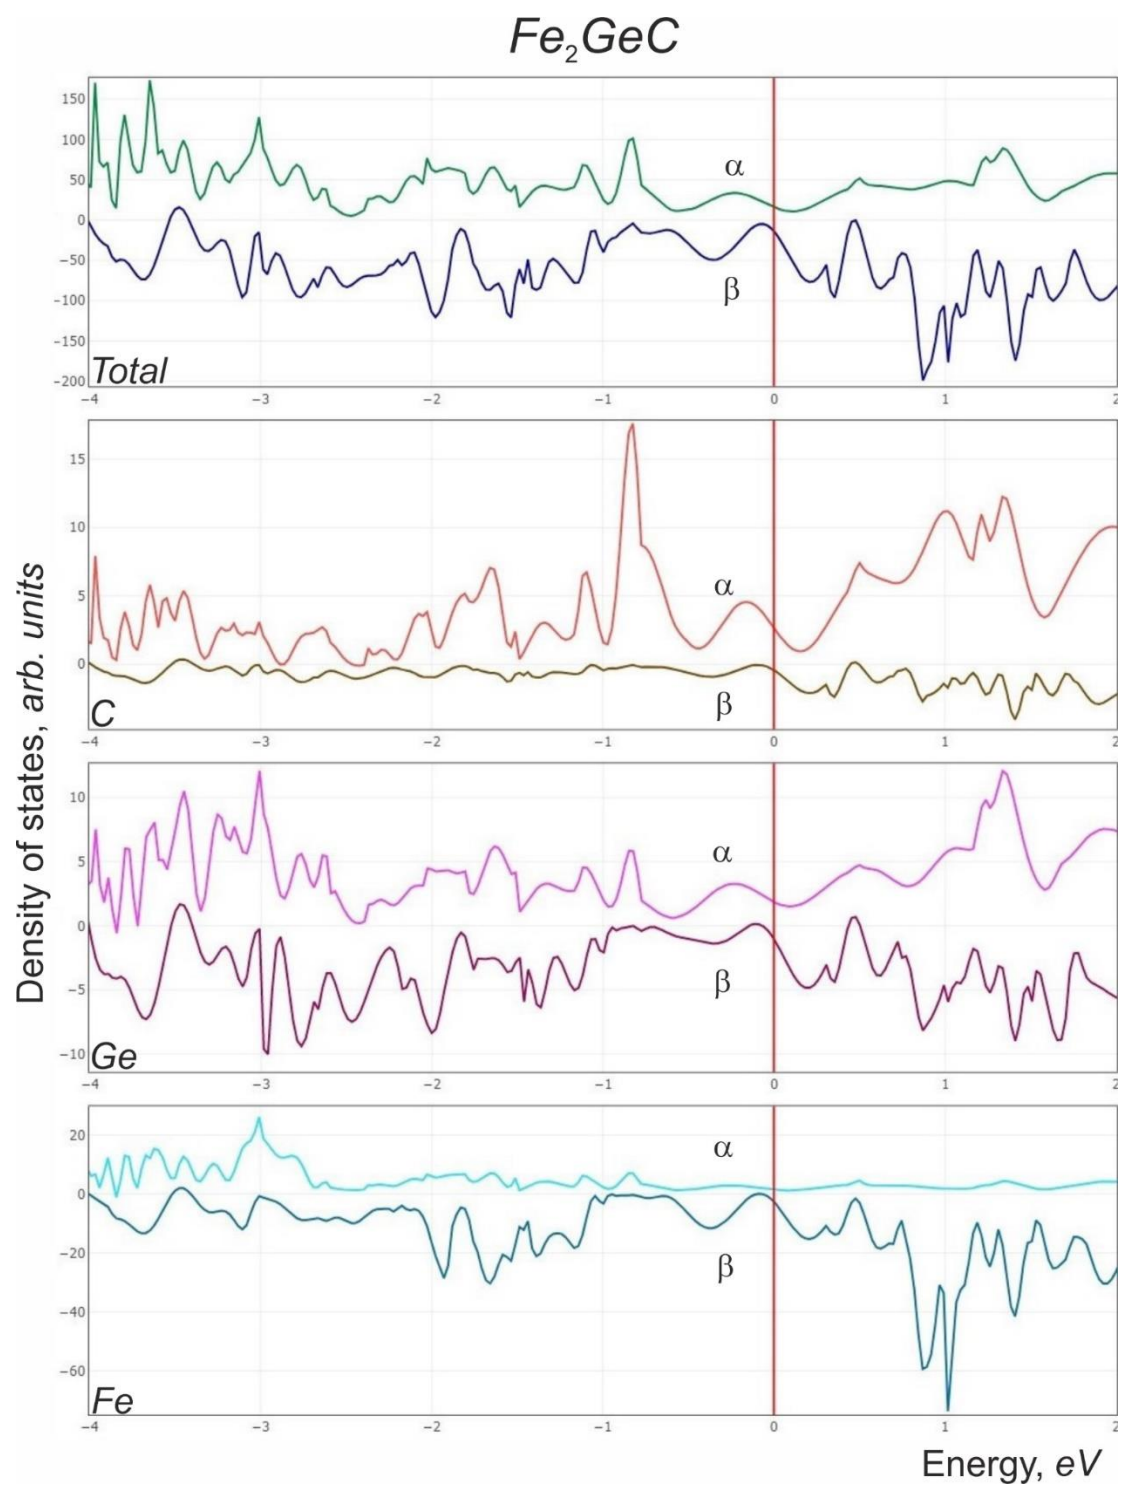

Figure S7. Densities of states of the  $\text{Fe}_2\text{GeC}$ .



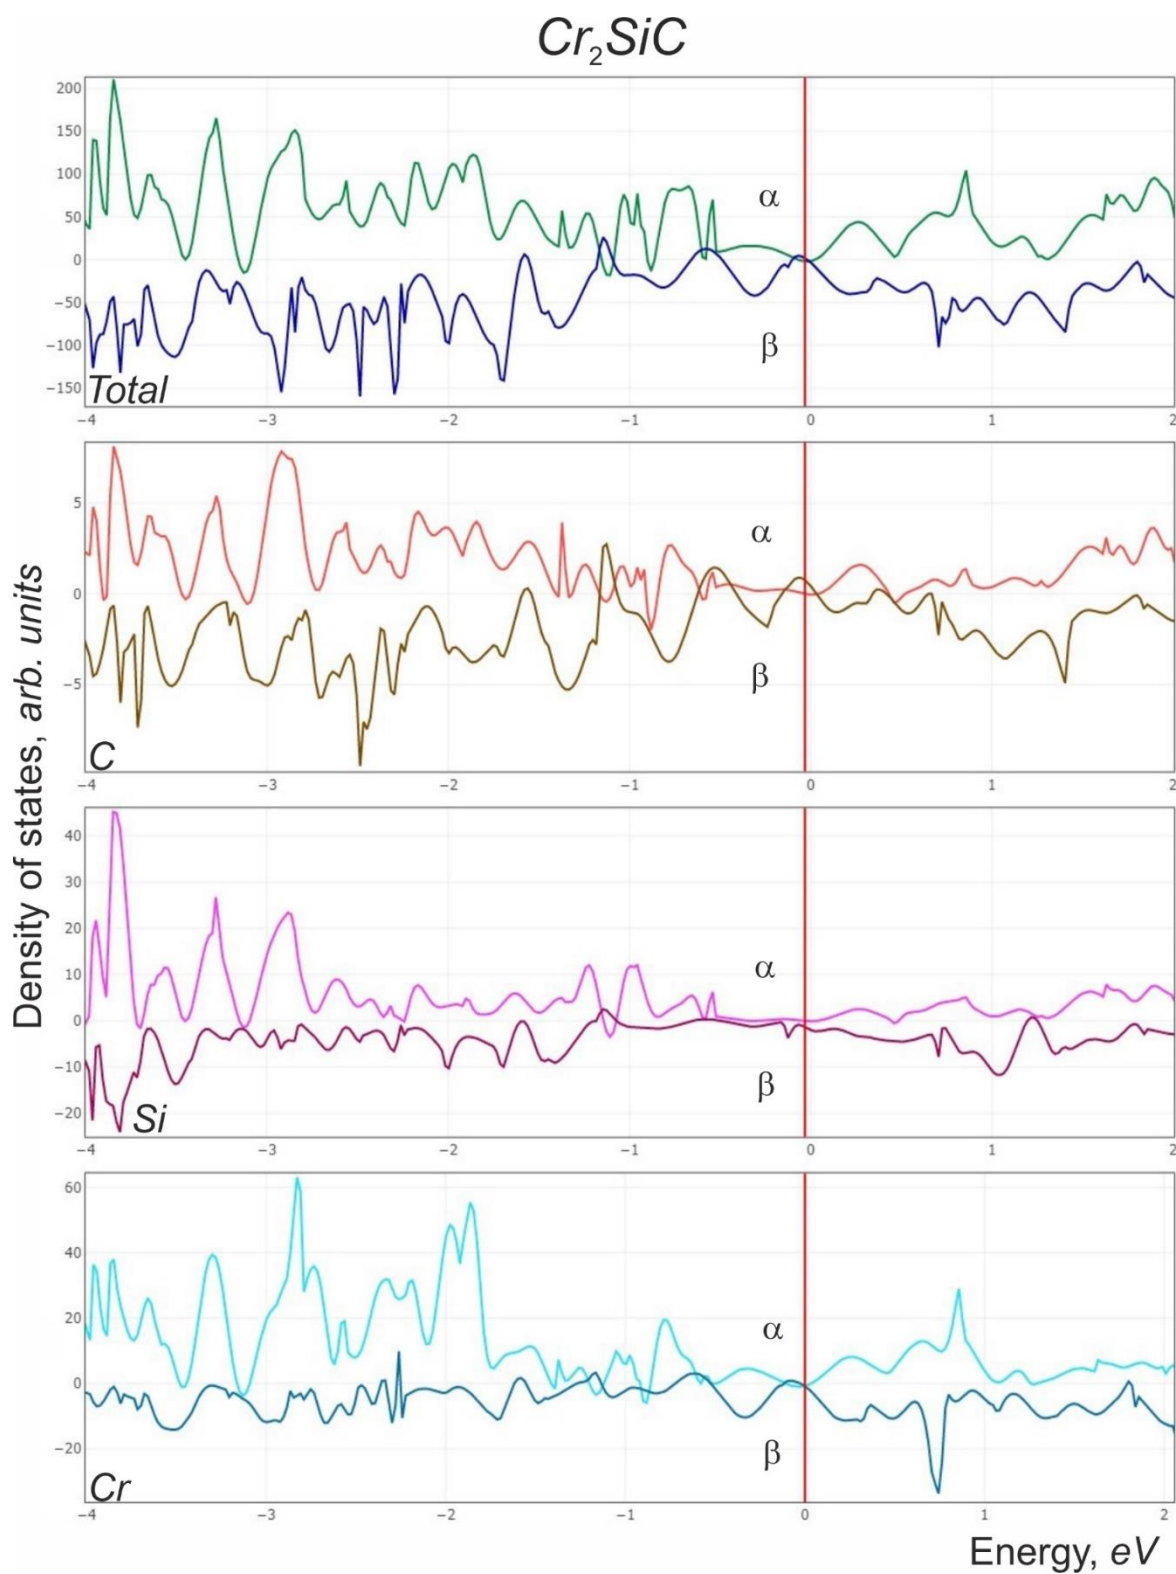

Figure S8. Densities of states of the  $Cr_2SiC$ .

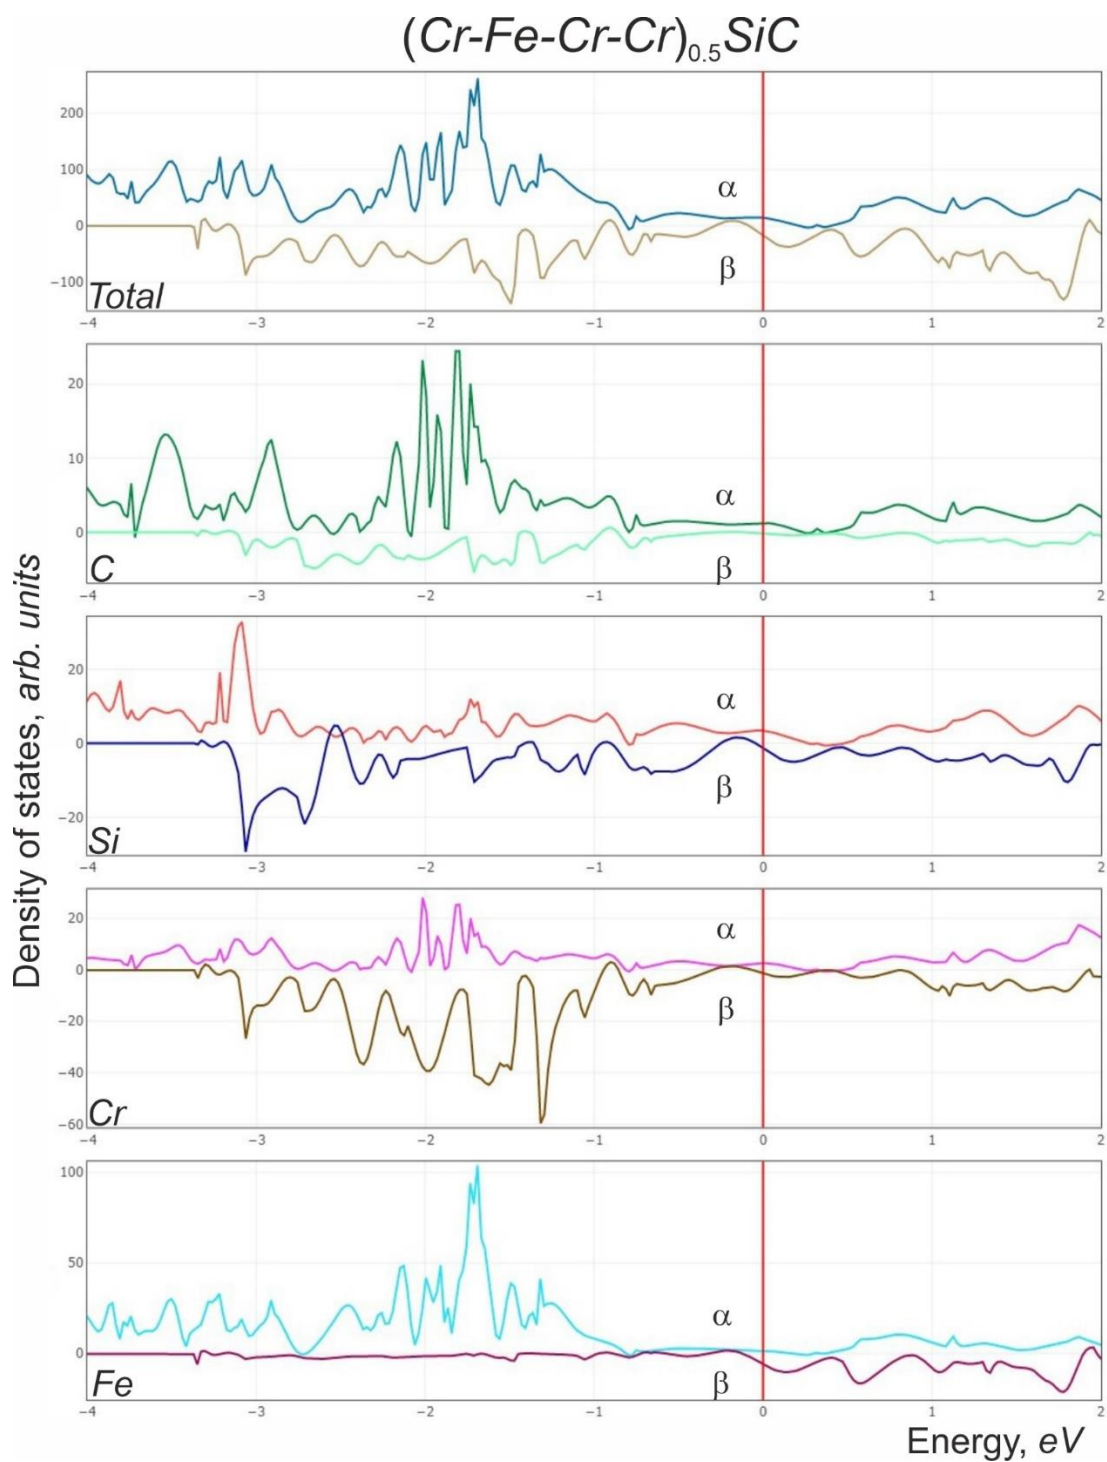

Figure S9. Densities of states of the  $(\text{Cr-Fe-Cr-Cr})\text{SiC}$ .

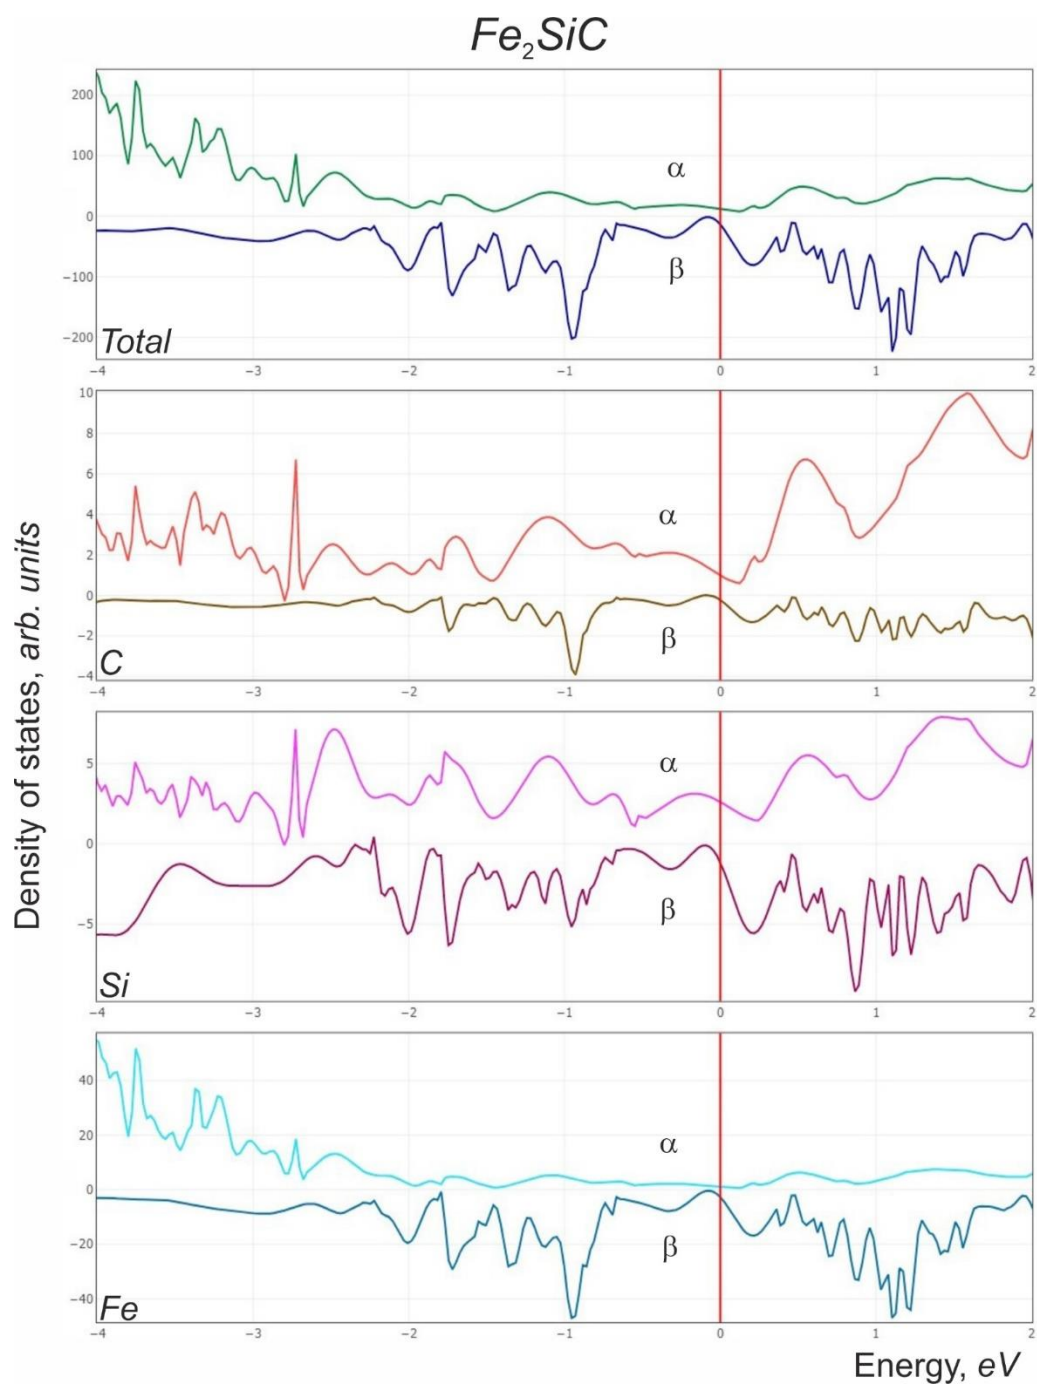

Figure S10. Densities of states of the  $Fe_2SiC$ .

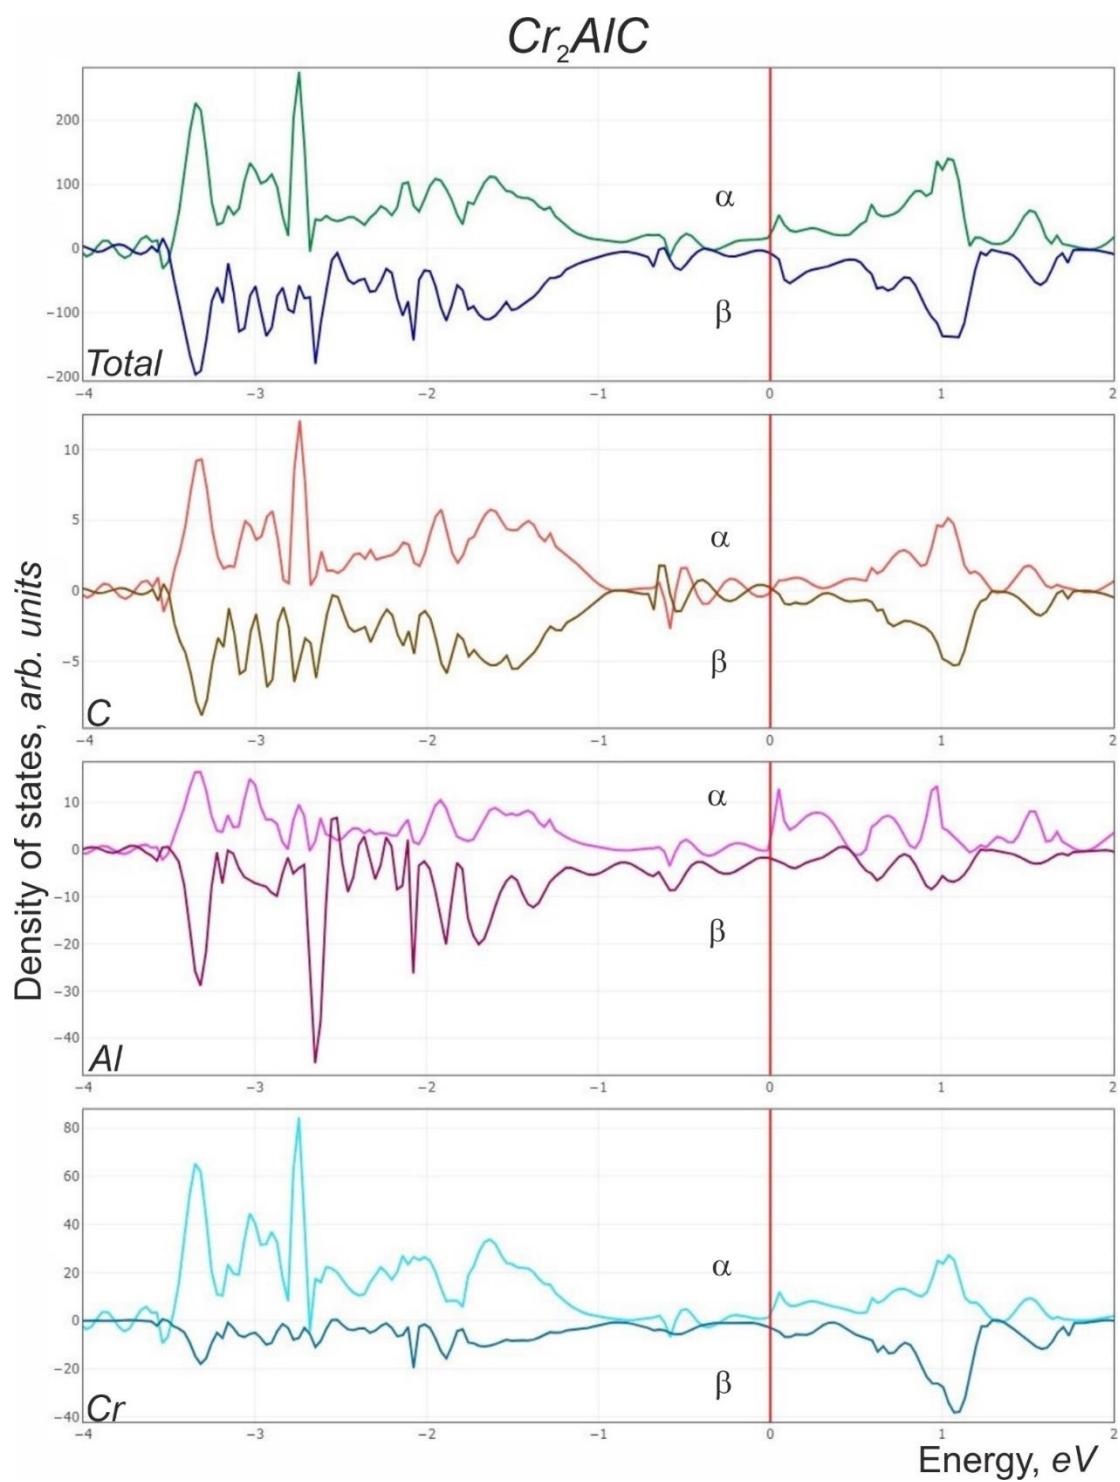

Figure S11. Densities of states of the  $Cr_2AlC$

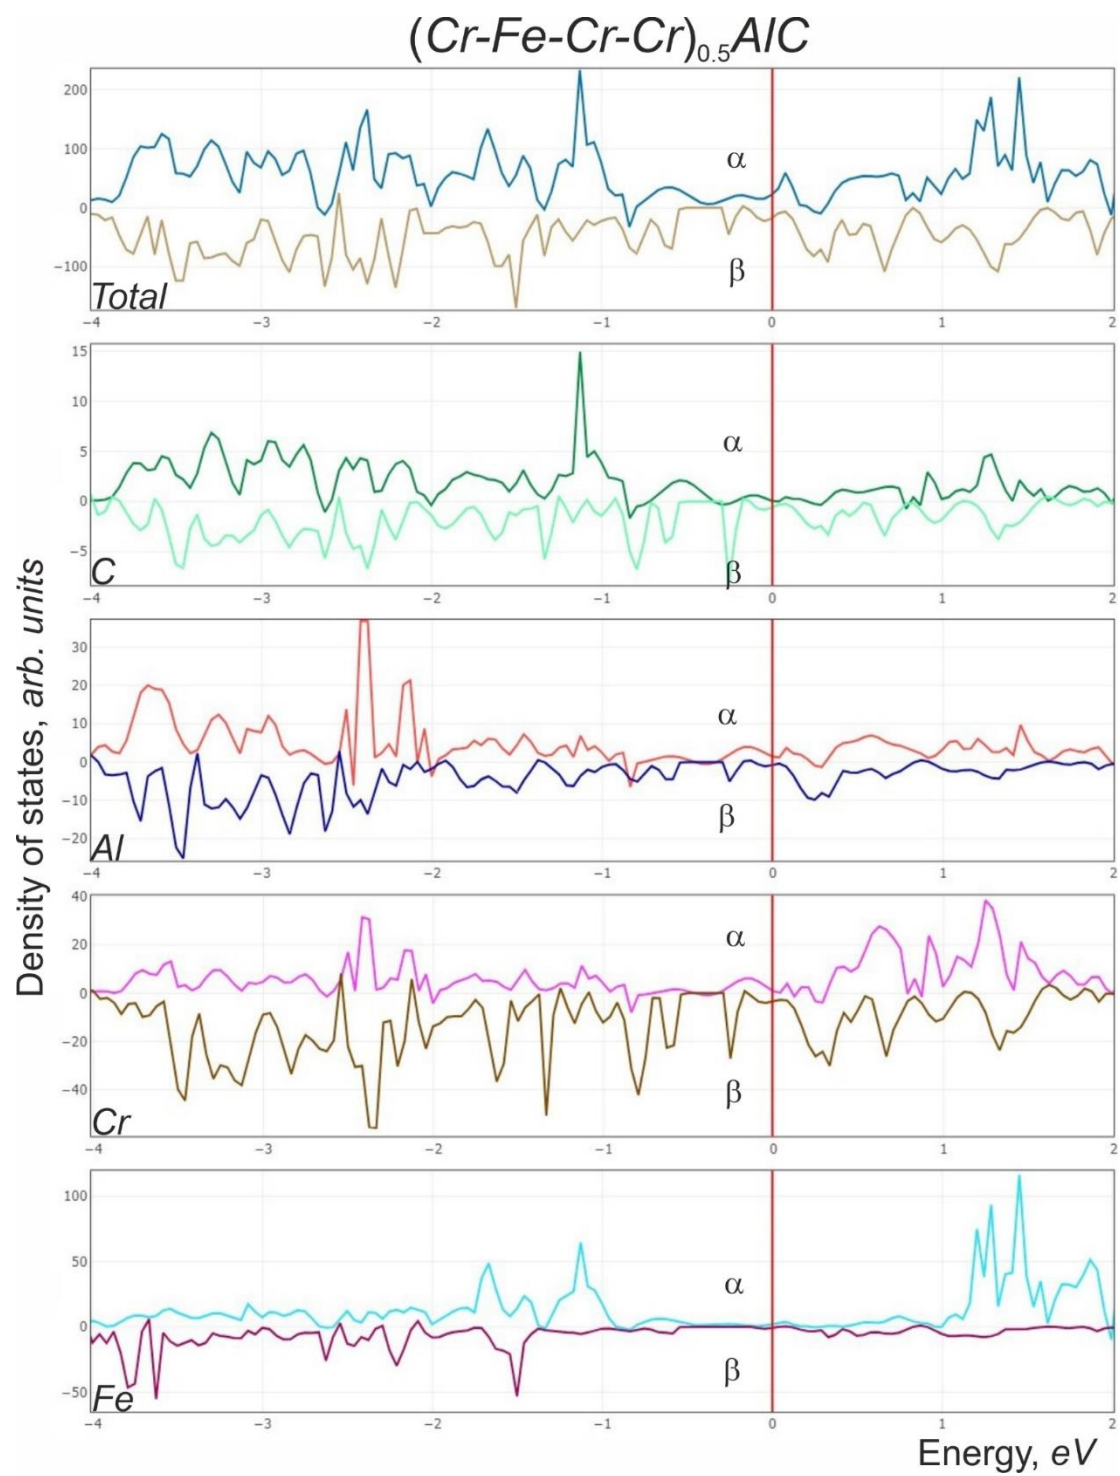

Figure S12. Densities of states of the  $(\text{Cr-Fe-Cr-Cr})\text{AlC}$



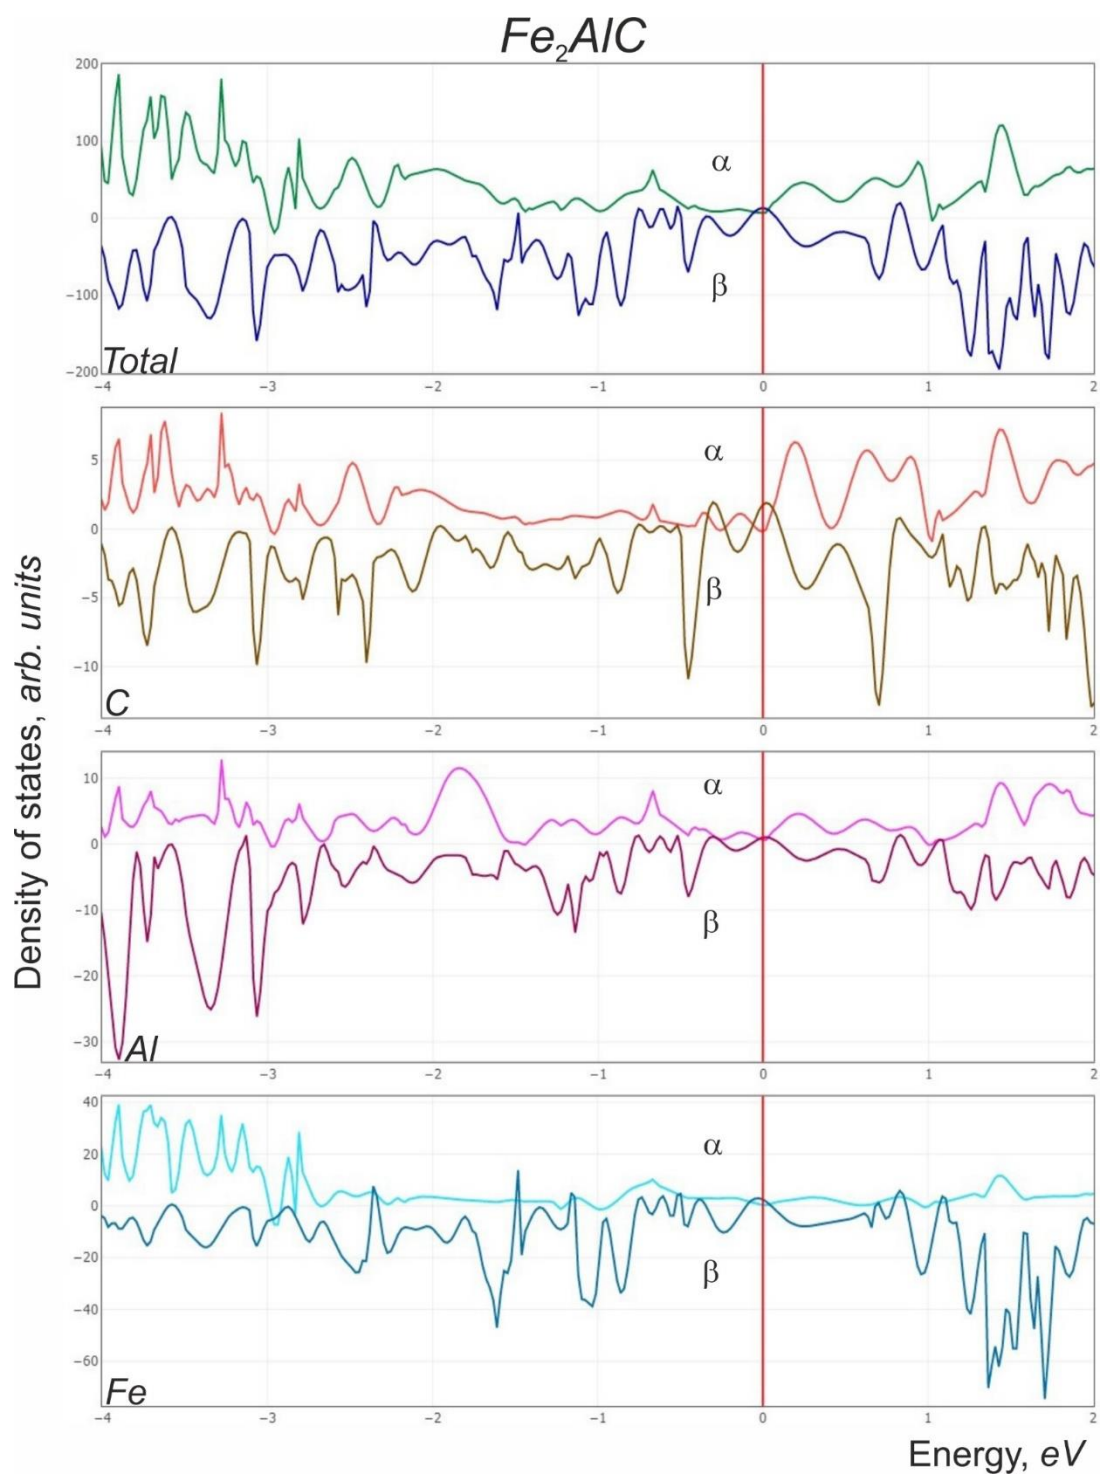

Figure S13. Densities of states of the  $Fe_2AlC$
